# Supplementary material for: Modeling a cataract disorder in mice with prime editing
Source: PubMed Central journal article supplement — Mol Ther Nucleic Acids. 2021 Jul 2;25:494–501. doi: 10.1016/j.omtn.2021.06.020 (PMC8463286; doi:10.1016/j.omtn.2021.06.020), 2021-07-02
Supplement: mmc1.pdf [file mmc1.pdf]

**OMTN, Volume 25**

**Supplemental information**

**Modeling a cataract disorder  
in mice with prime editing**

**Jianxiang Lin, Xingchen Liu, Zongyang Lu, Shisheng Huang, Susu Wu, Wenxia Yu, Yao Liu, Xiaoguo Zheng, Xingxu Huang, Qiang Sun, Yunbo Qiao, and Zhen Liu**

**A****PE2+pegRNA2+nicking sgRNA plasmids**

| Group        | Blastocyst /Injected zygote | Edited/ Sequenced | Editing efficiency (%) |
|--------------|-----------------------------|-------------------|------------------------|
| Experiment 1 | 14/15                       | 0/3               | N/A                    |
| Experiment 2 | 13/14                       | 0/13              | N/A                    |
| Experiment 3 | 22/23                       | 1/21              | Indel                  |

N/A: not available

Edited: number of embryos with editing efficiency > 5%  
Sequenced: number of embryos successfully detected**B****Editing efficiency in blastocysts**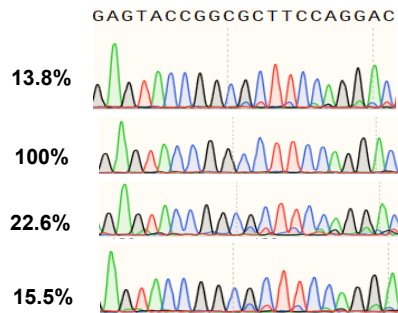**C**

| PBS length | Blastocyst /Injected zygote | Edited/ Sequenced | Editing efficiency (%) |
|------------|-----------------------------|-------------------|------------------------|
| 10 nt      | 15/19                       | 0/15              | N/A                    |
| 12 nt      | 16/16                       | 1/16              | 10.5%                  |
| 13 nt      | 13/17                       | 1/13              | 15.8%                  |
| 14 nt      | 18/18                       | 0/16              | N/A                    |
| 16 nt      | 13/16                       | 0/13              | N/A                    |
| 17 nt      | 16/16                       | 0/16              | N/A                    |

N/A: not available

Edited: number of embryos with editing efficiency > 5%  
Sequenced: number of embryos successfully detected**Figure. S1 Additional data for prime editing *in vivo*.**

**A.** The editing efficiency in blastocysts induced by PE2, pegRNA2, and a nicking sgRNA (three components are all plasmids). Three independent experiments were performed, and the number of blastocysts was presented. Only one blastocyst with indel was identified in experiment 3.

**B.** Original sanger sequencing data in [Figure 2A](#).

**C.** The effect of PBS length on prime editing efficiency was examined. pegRNAs with indicated length of PBS were constructed, and pegRNAs were co-injected with PE2 and nicking sgRNA plasmids into zygotes for editing efficiency analysis in blastocysts.

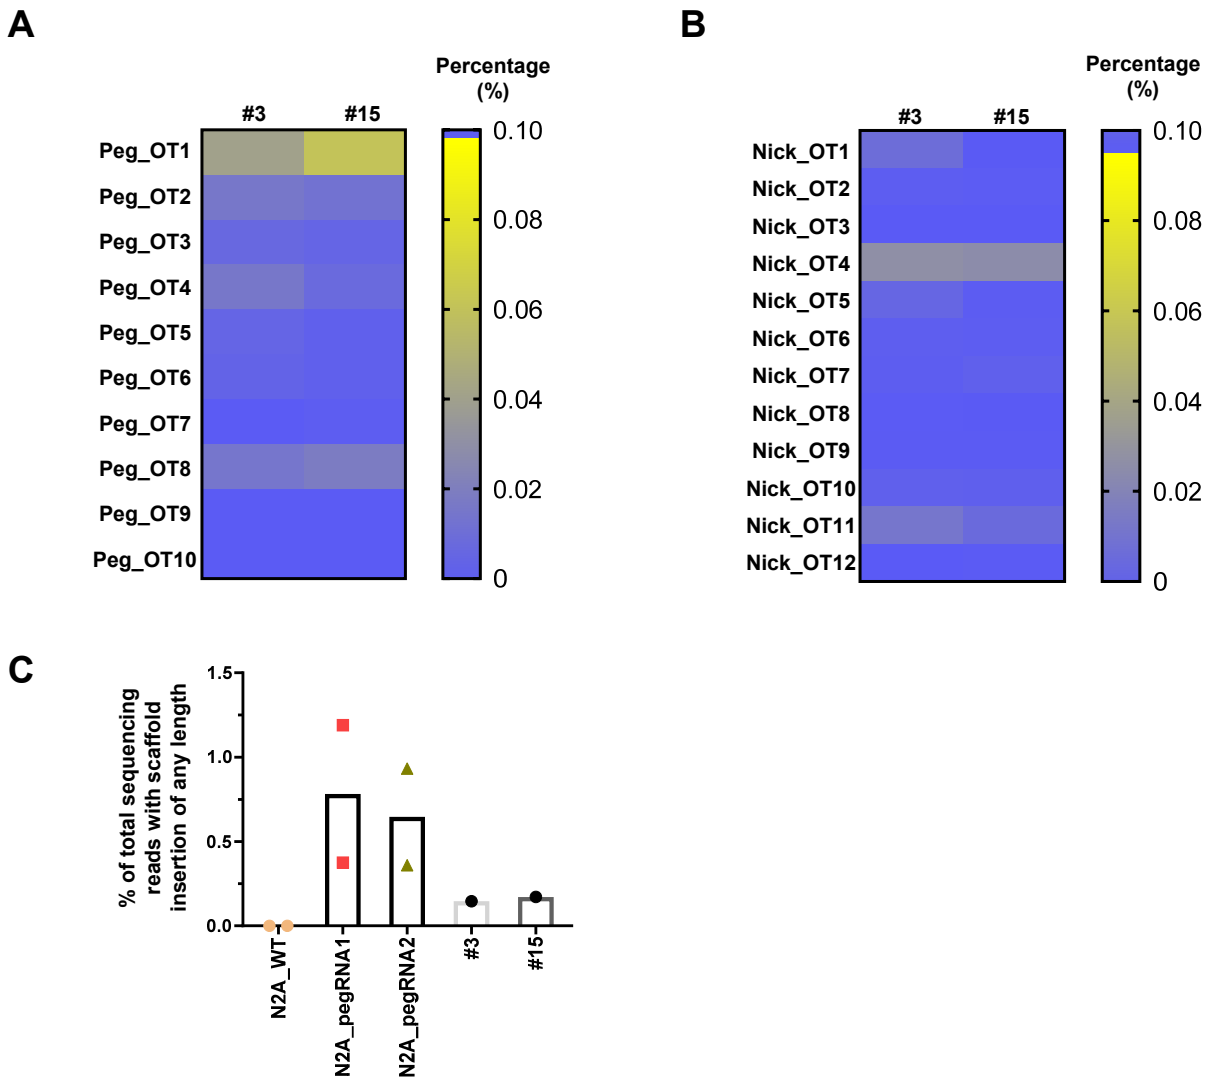

**Figure. S2 Off-target analysis.**

**A.** The indel efficiencies (potential off-targeting nucleotide-deletion efficiencies) in two PE3-generated mutant mice. The potential off-target sites for the pegRNA1 were predicted by Cas-OFFinder3, and off-targeting efficiency was measured by targeted deep sequencing.

**B.** The indel efficiencies induced by the nicking sgRNA in two PE3-generated mutant mice. The potential off-target sites for the nicking sgRNA were predicted by Cas-OFFinder3, and off-targeting efficiency was measured by targeted deep sequencing.

**C.** The percentage of total sequencing reads containing one or more pegRNA scaffold sequence nucleotides within an insertion adjacent to the RT template was analyzed in PE3 editing experiments in N2A cells (Figure 1F) and edited mice (#3 and #15). Wildtype (WT) N2A cells served as a control.

**Table S1. Synthesized DNA oligo sequences for pegRNA construction.**

| <b>Primer Name</b>                                      | <b>Primer sequences (5' to 3')</b>                                     |
|---------------------------------------------------------|------------------------------------------------------------------------|
| Crygc-pegRNA-spacer-Forward                             | accgagccccagtcctggaagcgctttt                                           |
| Crygc-pegRNA-spacer-Reverse                             | ctctaaaacgccttccaggactggggct                                           |
|                                                         |                                                                        |
| Crygc-pegRNA1-3' extension oligo-Forward                | gtgcgagtaccggccttccaggactgg                                            |
| Crygc-pegRNA1-3' extension oligo-Reverse                | aaaaccagtcctggaaggccggtactc                                            |
|                                                         |                                                                        |
| Crygc-pegRNA2-3' extension oligo-Forward                | gtgccaagagtaccggccttccaggactgg                                         |
| Crygc-pegRNA2-3' extension oligo-Reverse                | aaaaccagtcctggaaggccggtactcttg                                         |
|                                                         |                                                                        |
| Scaffold Forward                                        | agagctagaaatagcaagttaaataaggctagtccgttatcaa<br>cttgaaaaagtggcaccgagtcg |
| Scaffold Reverse                                        | gcaccgactcgggtccactttttcaagtgataacggactagcct<br>tattttaacttgctatttctag |
|                                                         |                                                                        |
| Crygc-pegRNA-spacer-Forward-for correction              | accgagccccagtcctggaaggcgctttt                                          |
| Crygc-pegRNA-spacer-Reverse-for correction              | ctctaaaacgccttccaggactggggct                                           |
|                                                         |                                                                        |
| Crygc-pegRNA3-3' extension oligo-Forward-for correction | gtgccaagagtaccggccttccaggactgg                                         |
| Crygc-pegRNA3-3' extension oligo-Reverse-for correction | aaaaccagtcctggaaggccggtactcttg                                         |

**Table S2. PCR primer sequences for genotyping.**

| <b>Primer Name</b>                  | <b>Primer sequences (5' to 3')</b> |
|-------------------------------------|------------------------------------|
| Crygc genotyping PCR-Forward        | tgatggagctgagcgaggattg             |
| Crygc genotyping PCR-Reverse        | cagggtttgccaacaatacagac            |
| Crygc genotyping PCR-Forward-Index1 | ATCACGTgatggagctgagcgaggattg       |
| Crygc genotyping PCR-Reverse-Index2 | CGATGTTcagggtttgccaacaatacagac     |
| Crygc genotyping PCR-Forward-Index3 | TTAGGCAGtgatggagctgagcgaggattg     |
| Crygc genotyping PCR-Reverse-Index4 | TGACCAGcagggtttgccaacaatacagac     |
| Crygc genotyping PCR-Forward-Index5 | ACAGTGCTtgatggagctgagcgaggattg     |
| Crygc genotyping PCR-Reverse-Index6 | GCCAATcagggtttgccaacaatacagac      |

**Table S3. Summary of Off-target sites.**

| <b>Target sequence</b>         | <b>Bulge Type</b> | <b>Bulge size</b> | <b>Mismatch</b> | <b>Number of Found Targets</b> |
|--------------------------------|-------------------|-------------------|-----------------|--------------------------------|
| <b>AGCCCCAGTCCTGGAAGCGCNGG</b> | <b>X</b>          | <b>0</b>          | <b>0</b>        | <b>1</b>                       |
| <b>AGCCCCAGTCCTGGAAGCGCNGG</b> | <b>X</b>          | <b>0</b>          | <b>1</b>        | <b>0</b>                       |
| <b>AGCCCCAGTCCTGGAAGCGCNGG</b> | <b>X</b>          | <b>0</b>          | <b>2</b>        | <b>1</b>                       |
| <b>AGCCCCAGTCCTGGAAGCGCNGG</b> | <b>X</b>          | <b>0</b>          | <b>3</b>        | <b>27</b>                      |
| <b>AGCCCCAGTCCTGGAAGCGCNGG</b> | <b>X</b>          | <b>0</b>          | <b>4</b>        | <b>182</b>                     |
| <b>AGCCCCAGTCCTGGAAGCGCNGG</b> | <b>X</b>          | <b>0</b>          | <b>5</b>        | <b>1688</b>                    |
| <b>TATGAGATGCCTAACTACCGNGG</b> | <b>X</b>          | <b>0</b>          | <b>0</b>        | <b>1</b>                       |
| <b>TATGAGATGCCTAACTACCGNGG</b> | <b>X</b>          | <b>0</b>          | <b>1</b>        | <b>1</b>                       |
| <b>TATGAGATGCCTAACTACCGNGG</b> | <b>X</b>          | <b>0</b>          | <b>2</b>        | <b>3</b>                       |
| <b>TATGAGATGCCTAACTACCGNGG</b> | <b>X</b>          | <b>0</b>          | <b>3</b>        | <b>8</b>                       |
| <b>TATGAGATGCCTAACTACCGNGG</b> | <b>X</b>          | <b>0</b>          | <b>4</b>        | <b>46</b>                      |
| <b>TATGAGATGCCTAACTACCGNGG</b> | <b>X</b>          | <b>0</b>          | <b>5</b>        | <b>479</b>                     |

**Table S4. Potential off-target sites for pegRNA1 and primers for detecting potential off-targeting efficiency.**

| <b>Name</b>                          | <b>Sequence (5' to 3')</b> |
|--------------------------------------|----------------------------|
| pegRNA off-target site1              | AGCCCCCTGTCCTGGGAGCCCAGG   |
| pegRNA off-target site1 PCR-Forward  | GATACACAGATGATAGGCAG       |
| pegRNA off-target site1 PCR- Reverse | TTGTCTGTCAGTGA CTGGTT      |
| pegRNA off-target site2              | AGCCCCAGCCCTGGAAGTGGAGG    |
| pegRNA off-target site2 PCR-Forward  | CCGTTTCACCACCATAAGG        |
| pegRNA off-target site2 PCR-Reverse  | TTAGTGTAGGCTGTGTACCT       |
| pegRNA off-target site3              | AGCCCCACTCTTGGAACGCTGG     |
| pegRNA off-target site3 PCR-Forward  | CAAAGGAAGAATGCTGACC        |
| pegRNA off-target site3 PCR-Reverse  | GAAGACACTCCGATTTTCAT       |
| pegRNA off-target site4              | AGCCCCAGTCCTGGAAAATCGGG    |
| pegRNA off-target site4 PCR-Forward  | CAACCAAGAGATGAGTAGCT       |
| pegRNA off-target site4 PCR- Reverse | ATGGAGACAGAGATGACAAG       |
| pegRNA off-target site5              | AGCCCCGGGCCAGGAAGCGCTGG    |
| pegRNA off-target site5 PCR-Forward  | ATCTGACAGACAGTGTGTG        |
| pegRNA off-target site5 PCR-Reverse  | GAGGAGGAATCCTGATCACA       |
| pegRNA off-target site6              | AACGCCAGTCCTGGAAGAGCTGG    |
| pegRNA off-target site6 PCR-Forward  | TGTTACCTTGTAACCTG          |
| pegRNA off-target site6 PCR-Reverse  | CCACCACCTGAAATGCAAT        |
| pegRNA off-target site7              | AGACCCACTCGTGGAAAGCGCAGG   |
| pegRNA off-target site7 PCR-Forward  | TTACCTGTAAGGTGTCACAG       |
| pegRNA off-target site7 PCR-Reverse  | TATGTGTCTGTGTGTGTGTC       |
| pegRNA off-target site8              | AGCCCCAGCCCTGGCAGCCCTGG    |
| pegRNA off-target site8 PCR-Forward  | ACAGATGAAGATGCTGCTT        |
| pegRNA off-target site8 PCR- Reverse | ATGGTTAACCAGAGAAGG         |
| pegRNA off-target site9              | AGGCTCAGTCCAGGAAGCGCTGG    |
| pegRNA off-target site9 PCR-Forward  | ACATCATCTCCCTGTGTTC        |
| pegRNA off-target site9 PCR-Reverse  | CATGCTAAGCCATTACCTG        |
| pegRNA off-target site10             | AGCCTCAGTCCTGGAGGCGATGG    |
| pegRNA off-target site10 PCR-Forward | ATAGTTCTGGACAAGTGGC        |
| pegRNA off-target site10 PCR-Reverse | TGTGACACCCAGTCCTCTT        |

**Table S5. Potential off-target sites for nicking sgRNA and primers for detecting potential off-targeting efficiency.**

| <b>Name</b>                            | <b>Sequence (5' to 3')</b> |
|----------------------------------------|----------------------------|
| Nicking off-target site1               | TATGAGATGCCCAACTACCGAGG    |
| Nicking off-target site1 PCR-Forward   | CTTGTGTCTGAGCTCATGGAC      |
| Nicking off-target site1 PCR- Reverse  | GGCTGTAACAAGCAAAAGGAG      |
| Nicking off-target site2               | TACGAGATGCCCAACTACCGGGG    |
| Nicking off-target site2 PCR-Forward   | CTACAGAGGCCAAATGGTGGA      |
| Nicking off-target site2 PCR- Reverse  | CTGTCCAGATGGAGAAAATGG      |
| Nicking off-target site3               | TATGAGATGCCTAGCTACAGAGG    |
| Nicking off-target site3 PCR-Forward   | GATGACTTCAGAGGACAAATG      |
| Nicking off-target site3 PCR- Reverse  | GGCTCTAGAGGAGGAAAGTA       |
| Nicking off-target site4               | TACGAGATGCCCAACTACCGGGG    |
| Nicking off-target site4 PCR-Forward   | ATCAGGATCTACGAGCGAGA       |
| Nicking off-target site4 PCR- Reverse  | CCATGATTCTCCTCAGAGAG       |
| Nicking off-target site5               | TATTAGACGCCTAACTACTGAGG    |
| Nicking off-target site5 PCR-Forward   | GAGTTAACCTTGCAGCAA         |
| Nicking off-target site5 PCR- Reverse  | TTAGCGGCTCAGTTACAGTA       |
| Nicking off-target site6               | TATGAGGAGCCAAACTACCGCGG    |
| Nicking off-target site6 PCR-Forward   | TCAAGGTAGTGAGGAGCTAG       |
| Nicking off-target site6 PCR- Reverse  | GTACGCAGTTGGGACTAGAA       |
| Nicking off-target site7               | TATAAGACGCCTAACTACTGAGG    |
| Nicking off-target site7 PCR-Forward   | TGAGTTAACCTTGCAGCAA        |
| Nicking off-target site7 PCR- Reverse  | GGCTCAGTTACAGTACTCAG       |
| Nicking off-target site8               | TGTGAGATGCCTACCTACTGTGG    |
| Nicking off-target site8 PCR-Forward   | GAAATGGGCATTCCCTATTAG      |
| Nicking off-target site8 PCR- Reverse  | TGTCTTGAATACCTCCCTCC       |
| Nicking off-target site9               | TATGAGCTACCCAACTACCGTGG    |
| Nicking off-target site9 PCR-Forward   | AGATGTACGAAACCACGGAA       |
| Nicking off-target site9 PCR- Reverse  | TCAGGGAGA ACTCTATGGTC      |
| Nicking off-target site10              | TATGAGATGTATAACTACCTAGG    |
| Nicking off-target site10 PCR-Forward  | GGGTGAGATGTACTATCATGG      |
| Nicking off-target site10 PCR- Reverse | TCTGTACCAACATAGCCTT        |
| Nicking off-target site11              | TATGAGAGCCCTAACTACAGAGG    |
| Nicking off-target site11 PCR-Forward  | GGGTCCATGTTTATCAAAGG       |
| Nicking off-target site11 PCR- Reverse | GTTTCTCTGCTCTCAGATC        |
| Nicking off-target site12              | TATGAGGTGCCTACCTACAGTGG    |
| Nicking off-target site12 PCR-Forward  | TTGGACTGTAGCCAGATTGA       |
| Nicking off-target site12 PCR- Reverse | TAGGTTGAAATAACTTCAA        |
